# Supplementary material for: Кластерная политика инновационного развития сектора нефтегазовой разведки и добычи
Source: Royal Society of Chemistry journal article supplement (doi:10.1039/d2dt03497b), 2011-01-01
Supplement: d2dt03497b1.pdf [file d2dt03497b1.pdf]

### Supplementary Information

#### Bismuth and antimony halometalates containing photoswitchable ruthenium nitrosyl complex

Artem Mikhailov<sup>a</sup>, Nikita Korobeynikov<sup>b</sup>, Andrey Usoltsev<sup>b</sup>, Sergey A. Adonin<sup>b</sup>, Gennadiy A. Kostin<sup>b</sup>, Dominik Schaniel<sup>a</sup>

<sup>a</sup> Université de Lorraine, CNRS, CRM2, UMR 7036, Nancy 54000, France

<sup>b</sup> Nikolaev Institute of Inorganic Chemistry, Siberian Branch of the Russian Academy of Sciences, 3 Acad. Lavrentiev Avenue, Novosibirsk 630090, Russian Federation

**Table S1.** Experimental and refinement details.

| Complex                                     | [RuNOPy <sub>4</sub> Br] <sub>4</sub> [Sb <sub>2</sub> Br <sub>8</sub> ][Sb <sub>3</sub> Br <sub>12</sub> ] <sub>2</sub> ( <b>1</b> ) | (H <sub>3</sub> O)[RuNOPy <sub>4</sub> Br] <sub>4</sub> [Bi <sub>2</sub> Br <sub>9</sub> ] <sub>3</sub> ·3H <sub>2</sub> O ( <b>2</b> ) |
|---------------------------------------------|---------------------------------------------------------------------------------------------------------------------------------------|-----------------------------------------------------------------------------------------------------------------------------------------|
| Empirical formula                           | C <sub>20</sub> H <sub>20</sub> Br <sub>9</sub> N <sub>5</sub> ORuSb <sub>2</sub>                                                     | C <sub>80</sub> H <sub>89</sub> Bi <sub>6</sub> Br <sub>31</sub> N <sub>20</sub> O <sub>8</sub> Ru <sub>4</sub>                         |
| Formula weight                              | 1410.17                                                                                                                               | 5593.07                                                                                                                                 |
| Temperature/K                               | 100                                                                                                                                   | 150                                                                                                                                     |
| Crystal system                              | monoclinic                                                                                                                            | triclinic                                                                                                                               |
| Space group                                 | P2 <sub>1</sub> /c                                                                                                                    | P-1                                                                                                                                     |
| a/Å                                         | 12.0218(11)                                                                                                                           | 15.1913(13)                                                                                                                             |
| b/Å                                         | 22.4544(19)                                                                                                                           | 17.2926(12)                                                                                                                             |
| c/Å                                         | 26.372(2)                                                                                                                             | 27.970(3)                                                                                                                               |
| α/°                                         | 90                                                                                                                                    | 96.349(3)                                                                                                                               |
| β/°                                         | 92.506(3)                                                                                                                             | 103.183(3)                                                                                                                              |
| γ/°                                         | 90                                                                                                                                    | 105.167(3)                                                                                                                              |
| Volume/Å <sup>3</sup>                       | 7112.2(11)                                                                                                                            | 6790.4(10)                                                                                                                              |
| Z                                           | 8                                                                                                                                     | 2                                                                                                                                       |
| ρ <sub>calc</sub> /cm <sup>3</sup>          | 2.634                                                                                                                                 | 2.735                                                                                                                                   |
| μ/mm <sup>-1</sup>                          | 12.064                                                                                                                                | 17.348                                                                                                                                  |
| F(000)                                      | 5152                                                                                                                                  | 5062                                                                                                                                    |
| Crystal size/mm <sup>3</sup>                | 0.217 × 0.205 × 0.106                                                                                                                 | 0.055 × 0.055 × 0.055                                                                                                                   |
| Radiation                                   | MoKα (λ = 0.71073)                                                                                                                    | MoKα (λ = 0.71073)                                                                                                                      |
| 2θ range for data collection/°              | 3.846 to 66.504                                                                                                                       | 2.876 to 51.362                                                                                                                         |
| Index ranges                                | -18 ≤ h ≤ 18, -34 ≤ k ≤ 34, -32 ≤ l ≤ 40                                                                                              | -18 ≤ h ≤ 18, -21 ≤ k ≤ 21, -34 ≤ l ≤ 31                                                                                                |
| Reflections collected                       | 256633                                                                                                                                | 73912                                                                                                                                   |
| Independent reflections                     | 27174 [R <sub>int</sub> = 0.0953, R <sub>sigma</sub> = 0.0588]                                                                        | 25709 [R <sub>int</sub> = 0.0590, R <sub>sigma</sub> = 0.0793]                                                                          |
| Data/restraints/parameters                  | 27174/2/685                                                                                                                           | 25709/12/1374                                                                                                                           |
| Goodness-of-fit on F <sup>2</sup>           | 1.053                                                                                                                                 | 1.044                                                                                                                                   |
| Final R indexes [I ≥ 2σ (I)]                | R <sub>1</sub> = 0.0393, wR <sub>2</sub> = 0.0780                                                                                     | R <sub>1</sub> = 0.0525, wR <sub>2</sub> = 0.1066                                                                                       |
| Final R indexes [all data]                  | R <sub>1</sub> = 0.0747, wR <sub>2</sub> = 0.0885                                                                                     | R <sub>1</sub> = 0.0754, wR <sub>2</sub> = 0.1150                                                                                       |
| Largest diff. peak/hole / e Å <sup>-3</sup> | 1.36/-1.82                                                                                                                            | 3.25/-1.93                                                                                                                              |

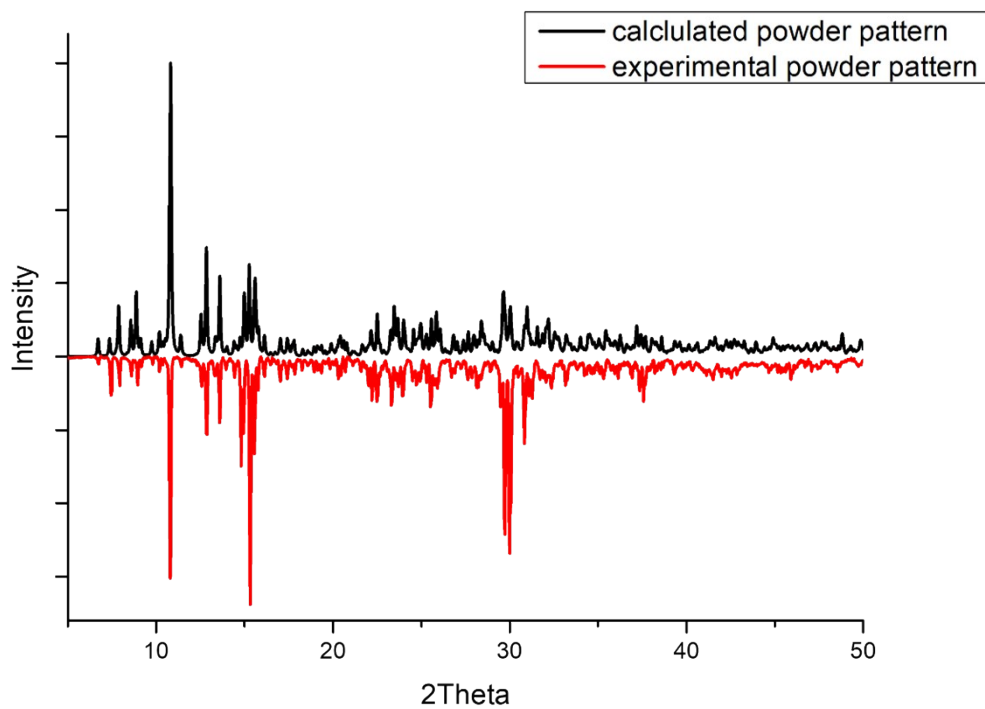

**Fig. S1.** PXRD data of **1**.

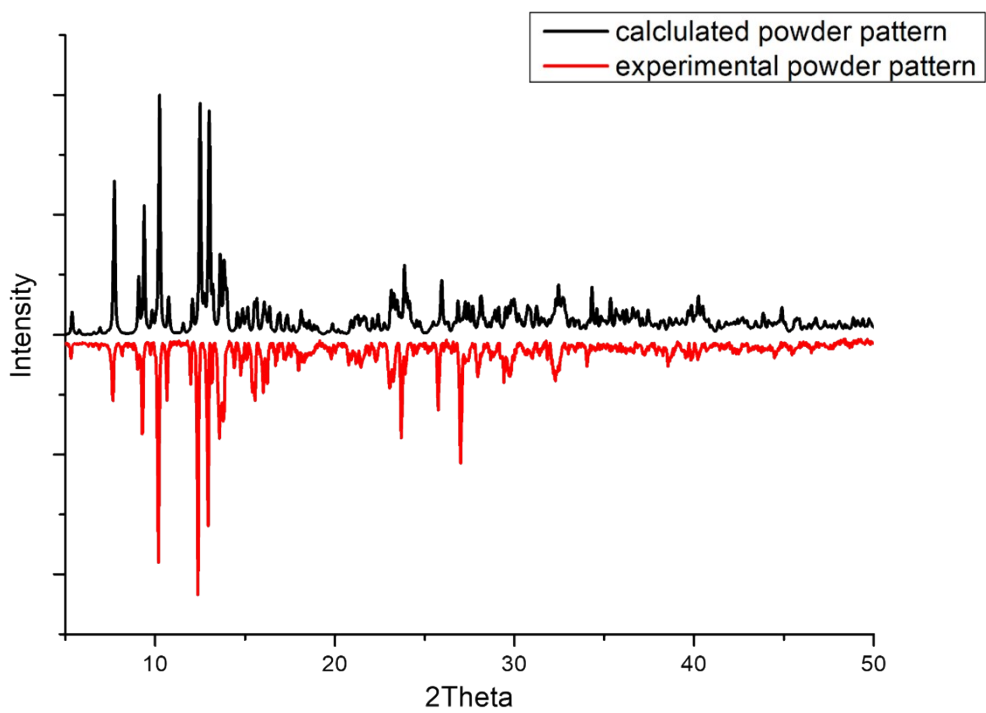

**Fig. S2.** PXRD data of **2**.

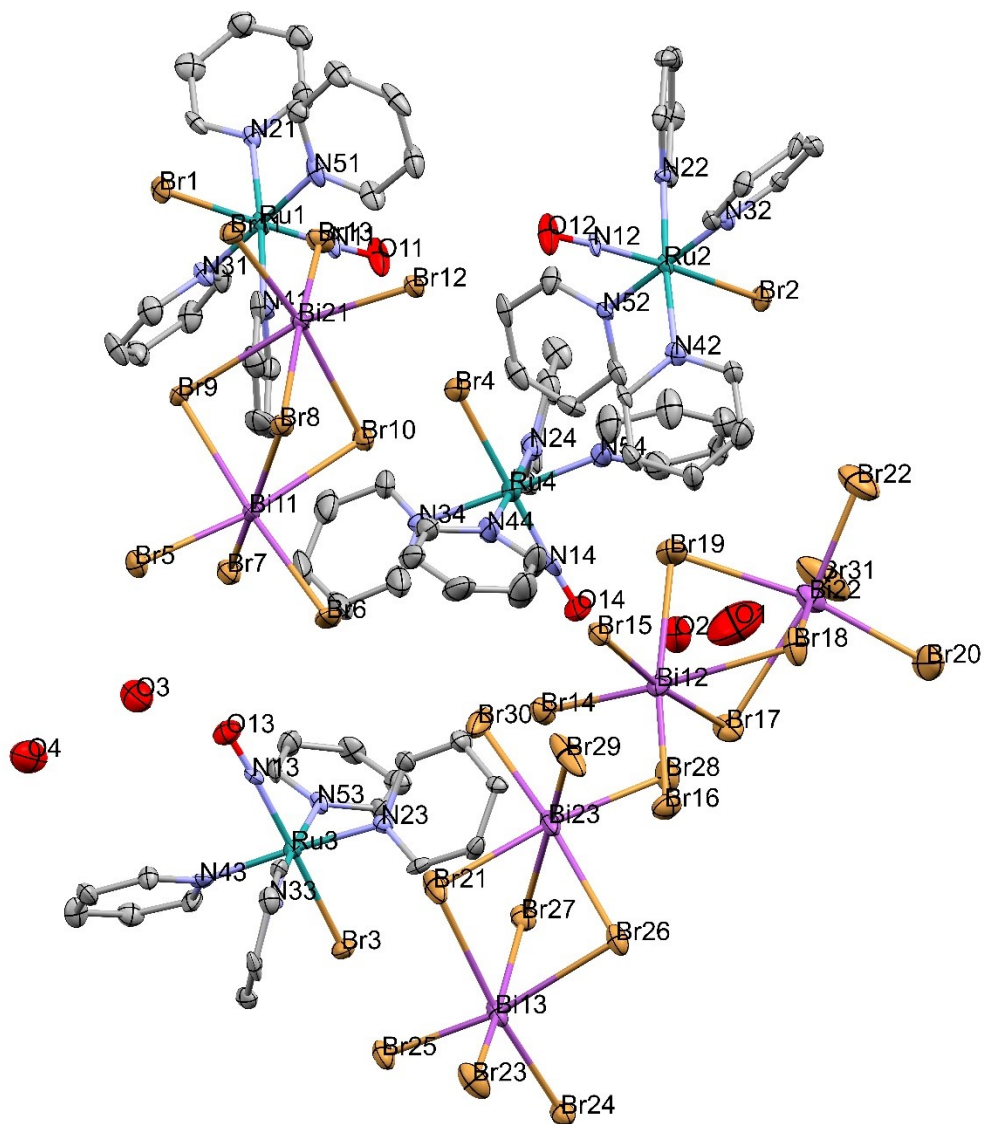

**Fig. S3.** The asymmetric unit of the structure of  $(\text{H}_3\text{O})[\text{RuNOPy}_4\text{Br}]_4[\text{Bi}_2\text{Br}_9]_3 \cdot 3\text{H}_2\text{O}$  (**2**). Hydrogen atoms are omitted for clarity.

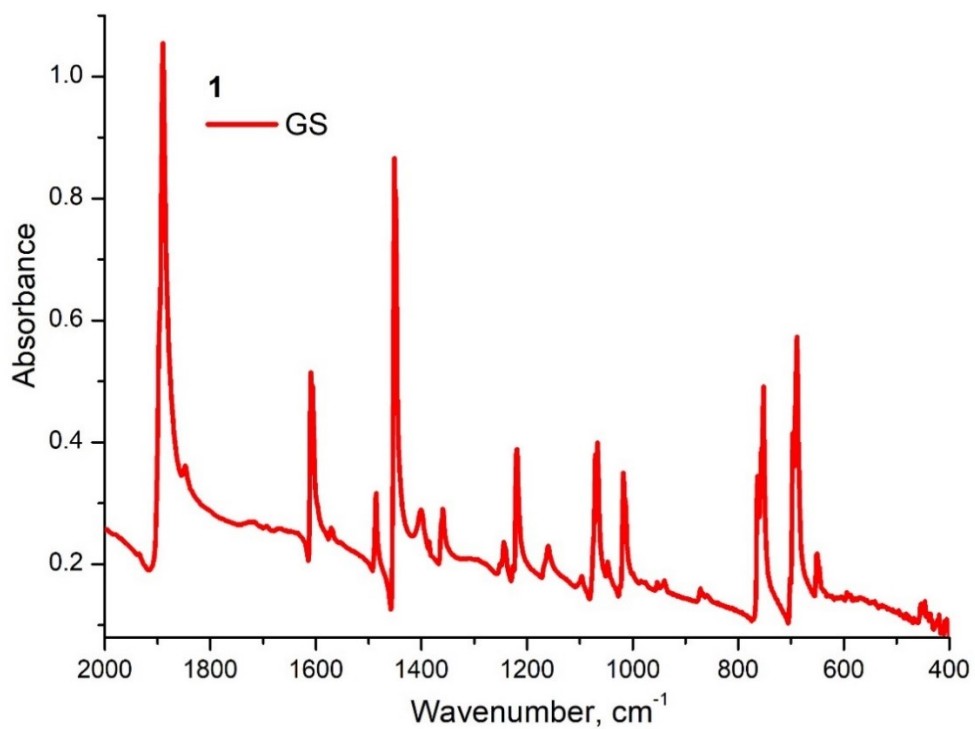

Fig. S4. IR-spectrum of **1** at 100 K.

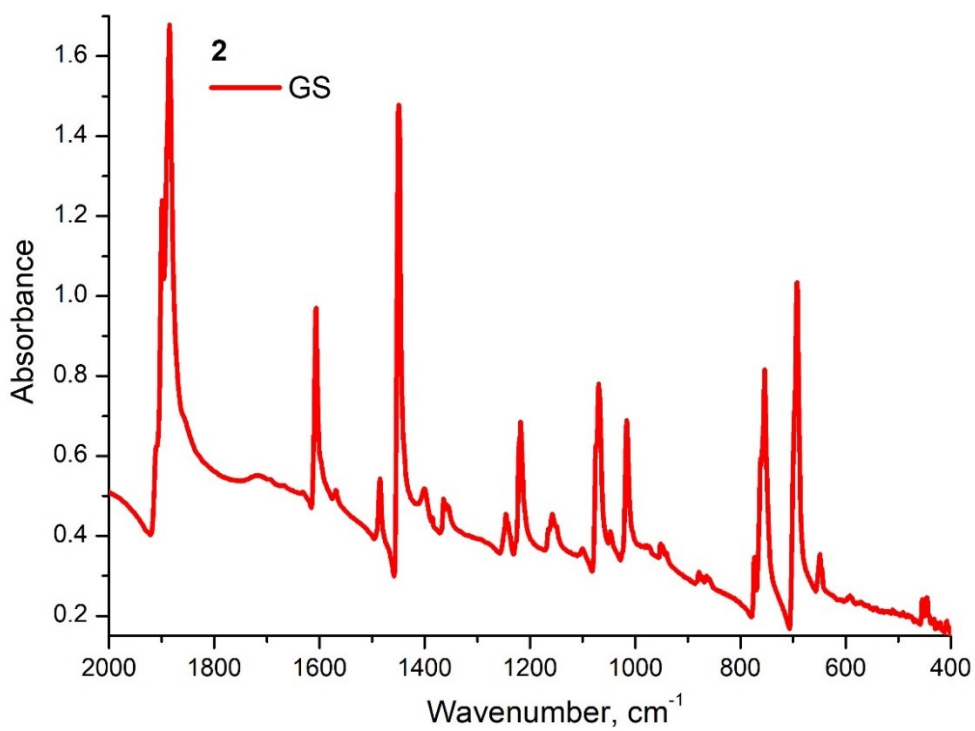

Fig. S5. IR-spectrum of **2** at 100 K.

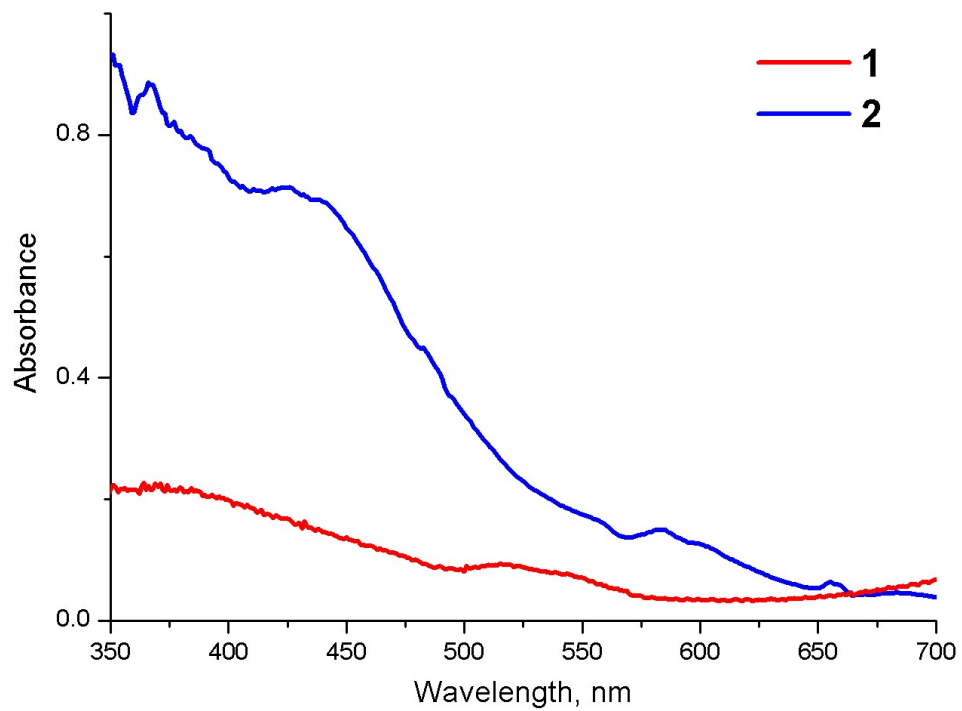

**Fig. S6.** UV-vis spectra of **1** and **2** in GS embedded into KBr matrix.
